# Supplementary material
Source: PubMed Central journal article supplement (PMC8907213)
Supplement: 41598_2022_7952_MOESM1_ESM.pdf [file 41598_2022_7952_MOESM1_ESM.pdf]

1 **First-in-class trispecific VHH-Fc based antibody with potent prophylactic and therapeutic**  
2 **efficacy against SARS-CoV-2 and variants**

3

4 Allison Titong<sup>1</sup>, Sachith Gallolu Kankanamalage<sup>1</sup>, Jianbo Dong<sup>1</sup>, Betty Huang<sup>1</sup>, Nicholas  
5 Spadoni<sup>1</sup>, Bo Wang<sup>1</sup>, Meredith Wright<sup>1</sup>, Keegan L.J. Pham<sup>1</sup>, Anh Hai Le<sup>1</sup>, and Yue Liu<sup>1,2, \*</sup>

6

7 1. Ab Studio Inc. 3541 Investment Blvd., Suite 3, Hayward, CA 94545, USA

8 2. Ab Therapeutics Inc. 3541 Investment Blvd., Suite 3, Hayward, CA 94545, USA

9

10 \* Corresponding author. All inquiries should be directed to [yue.liu@antibodystudio.com](mailto:yue.liu@antibodystudio.com)

11

12

13

14

15

16

17

18

19

20

21

22

23

24

25

26

27 **Supplementary Figure legends**

28 **Figure S1: ABS-VIR-001 is well-tolerated and prevents SARS-CoV-2-luc pseudovirus**  
29 **infection in huACE2 mice.** Tamoxifen inducible ACE-2 mice were challenged with SARS-CoV-  
30 2-luc pseudovirus (intranasally, I.N.) and were randomly divided into 3 groups and treated as  
31 indicated in Figure 1A and observed for body weight and bioluminescence (BLI). A) Body weight  
32 was indistinguishable between the treatment Groups 2 and 3 and the untreated Group 1,  
33 indicating ABS-VIR-001 was well-tolerated. (Error bars = SD) B) Raw BLI measurement from D3,  
34 D4, and D7 are shown with a BLI reduction from D3 to D7 for Group 2 and Group 3. (Error bars  
35 = SD).

36 **Figure S2: SARS-CoV-2 infection in huACE2 mice leads to a dose-dependent pathological**  
37 **change on lung tissue.** Human ACE-2 expressing mice were challenged with SARS-CoV-2  
38 (intranasally, I.N.) with various PFUs to determine the appropriate dose for the study. A) SARS-  
39 CoV-2 associated pathological changes on the lung tissue on mice challenged with 10 and 100  
40 PFU. At D4, even mouse challenged with 10 PFU showed pathological changes in the lung (mice  
41 1-1, 1-2, and 1-3), at 100 PFU there is a greater degree of pathological changes (mice 2-1, 2-2,  
42 and 2-3).

43 **Figure S3: ABS-VIR-001 was well-tolerated in all animals within the prophylactic and**  
44 **treatment groups in huACE2 mice challenged with authentic SARS-CoV-2.** Human ACE-2  
45 expressing mice were challenged with SARS-CoV-2 (intranasally, I.N.), randomly divided into 4  
46 groups and treated as indicated in Figure 2A, followed by the observation of their mean body  
47 weight and clinical symptoms. A) The quantitation of the mouse mean bodyweight normalized to  
48 the initial weight shows that all the mice within the prophylactic and treatment groups do not lose  
49 weight over time, indicating that ABS-VIR-001 is well-tolerated in animals.

50 **Figure S4: ABS-VIR-001 maintains high binding to SARS-CoV-2 triple mutant variant.** A)  
51 Binding kinetics graph for global KD of ABS-VIR-001 to wildtype (wt) RBD. B) Binding kinetics  
52 graph for global KD of ABS-VIR-001 to triple mutant (TriMut) RBD with mutations associated with

53 the Alpha and Beta SARS-CoV-2 variants. The data was generated by the GatorPrime software,  
54 and graphed in Prism (GraphPad). Taken together, this data shows that the mutations to the S  
55 protein RBD only show a slight decrease in the KD value which is still within picomolar level and  
56 a high level of binding.

57 **Figure S5: ABS-VIR-001 completely blocks SARS-CoV-2 triple mutant variant.** A) ABS-VIR-  
58 001 binds wt, and variants Delta, and Lambda SARS-CoV-2 blocks wt S protein RBD and Trimut  
59 S protein RBD in a comparable manner at every concentration tested, indicating that the blocking  
60 capacity is fully maintained despite the mutation. Furthermore, the VHH-Fc cocktails of the  
61 individual components of ABS-VIR-001 show a drastic, but incomplete reduction in blocking,  
62 demonstrating the overall efficiency of the trispecific ABS-VIR-001 antibody format.

63  
64  
65  
66  
67  
68  
69  
70  
71  
72  
73  
74  
75  
76  
77  
78

79 **Supplementary Tables**

80 **Table S1. Changes in body weight and survival of mice infected with SARS-CoV-2.**

| Group | Number of Mice | Infectious dose | Group weight (g), dpi |      |      |      |      | Survival number, dpi |   |   |                |                |
|-------|----------------|-----------------|-----------------------|------|------|------|------|----------------------|---|---|----------------|----------------|
|       |                |                 | 0                     | 1    | 2    | 3    | 4    | 0                    | 1 | 2 | 3              | 4              |
| 1     | 3              | 10PFU           | 68.4                  | 68.0 | 68.4 | 68.8 | 68.4 | 3                    | 3 | 3 | 3              | 3              |
| 2     | 3              | 100PFU          | 69.4                  | 68.9 | 68.9 | 67.9 | 42.3 | 3                    | 3 | 3 | 3 <sup>a</sup> | 2 <sup>a</sup> |
| 3     | 3              | 330PFU          | 66.1                  | 65.6 | 65.9 | 64.0 | -    | 3                    | 3 | 3 | 3 <sup>a</sup> | 0              |
| 4     | 3              | 1000PFU         | 69.1                  | 66.8 | 66.9 | 66.1 | -    | 3                    | 3 | 3 | 3 <sup>a</sup> | 0              |
| 5     | 3              | 10000PFU        | 68.8                  | 68.9 | 68.2 | 40.1 | -    | 3                    | 3 | 3 | 2 <sup>a</sup> | 0              |

81 <sup>a</sup> Observed depression

82

83

84

85

86

87

88

89

90

91

92

93

94

95

96

97 **Table S2. Viral load and pathological changes in lung tissue of mice on day 3 (1000 PFU)**  
 98 **or day 4 (10 or 100 PFU) after infection SARS-CoV-2.**

| Group | Number of mice | Infectious dose | Mouse Number | Pulmonary virus copy number [Log <sub>10</sub> (Copies/g)] |
|-------|----------------|-----------------|--------------|------------------------------------------------------------|
| 1     | 3              | 10PFU           | 1-1          | 8.01                                                       |
|       |                |                 | 1-2          | <2                                                         |
|       |                |                 | 1-3          | 7.59                                                       |
| 2     | 3              | 100PFU          | 2-1          | <2                                                         |
|       |                |                 | 2-2          | <2                                                         |
|       |                |                 | 2-3          | 6.66                                                       |
| 4     | 3              | 1000PFU         | 3-1          | 9.01                                                       |
|       |                |                 | 3-2          | 9.71                                                       |
|       |                |                 | 3-3          | 8.56                                                       |

99

100

101

102

103

104

105

106

107

108

109

110 **Table S3. Pathological changes of lung tissue in mice on day 3 (100 PFU) or day 4 (10 PFU)**  
 111 **after infection with authentic SARS-CoV-2.**

| Group | Number of mice | Infectious dose | Mouse Number | Pathological changes in the lungs                                                                                                                                                       |
|-------|----------------|-----------------|--------------|-----------------------------------------------------------------------------------------------------------------------------------------------------------------------------------------|
| 1     | 3              | 10 PFU          | 1-1          | Degeneration of bronchiolar epithelial cells, no other obvious changes                                                                                                                  |
|       |                |                 | 1-2          | Degeneration of bronchiolar epithelial cells, no other obvious changes                                                                                                                  |
|       |                |                 | 1-3          | Mild to moderate perivascular inflammation, degeneration of bronchiolar epithelial cells, and a small amount of inflammatory cell infiltration around                                   |
| 2     | 3              | 100 PFU         | 2-1          | Mild perivascular inflammation, degeneration of bronchiolar epithelial cells                                                                                                            |
|       |                |                 | 2-2          | Degeneration and necrosis of bronchiolar epithelial cells (nucleus condensation), inflammatory cell infiltration around blood vessels                                                   |
|       |                |                 | 2-3          | Mild perivascular inflammation, small blood vessel and alveolar wall capillary congestion, bronchiolar epithelial cell degeneration, perivascular edema, inflammatory cell infiltration |

112

113

114

115

116 **Supplementary Figures**

117 **Figure S1**

a

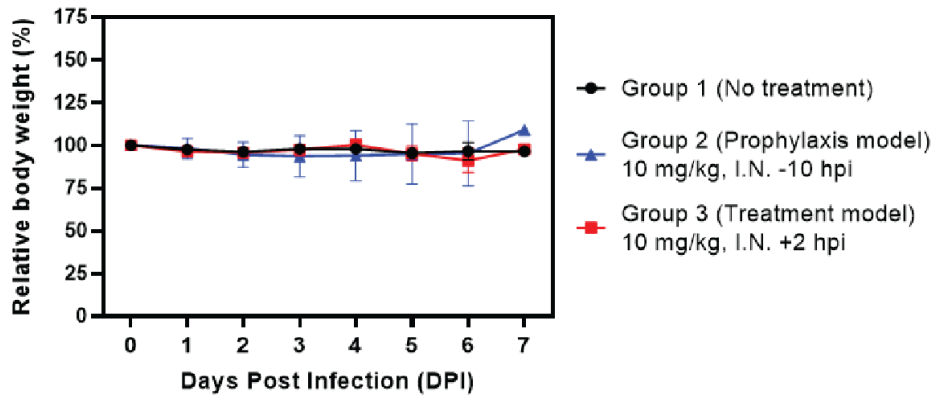

b

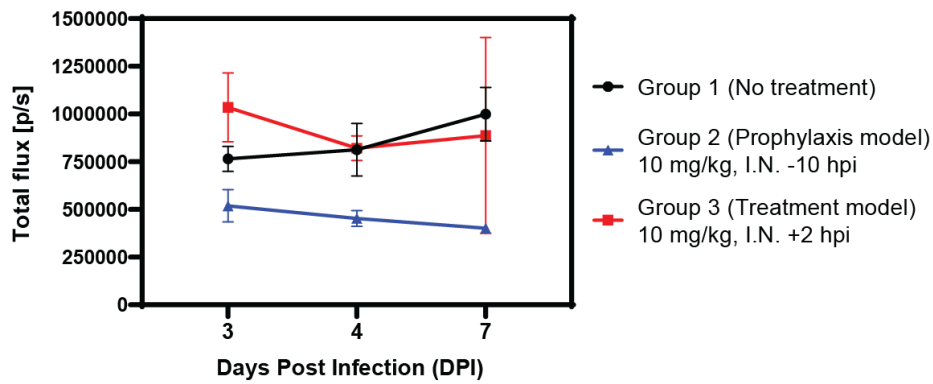

118

119

120

121

122

123

124

125

126

127

128 **Figure S2**

a

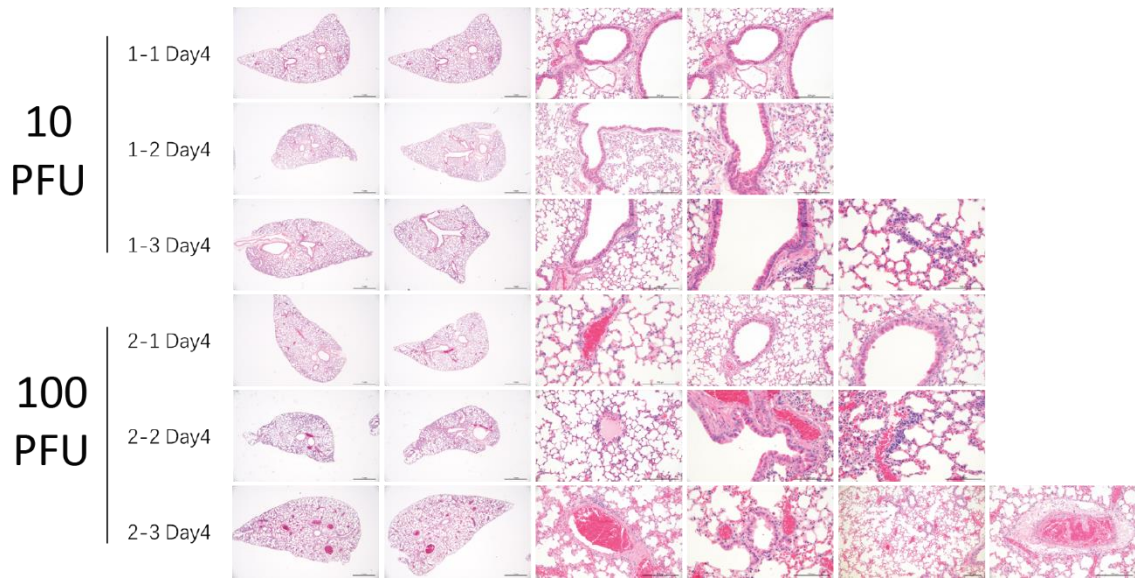

129

130

131

132

133

134

135

136

137

138

139

140

141

142

143

144



145 **Figure S3**

a

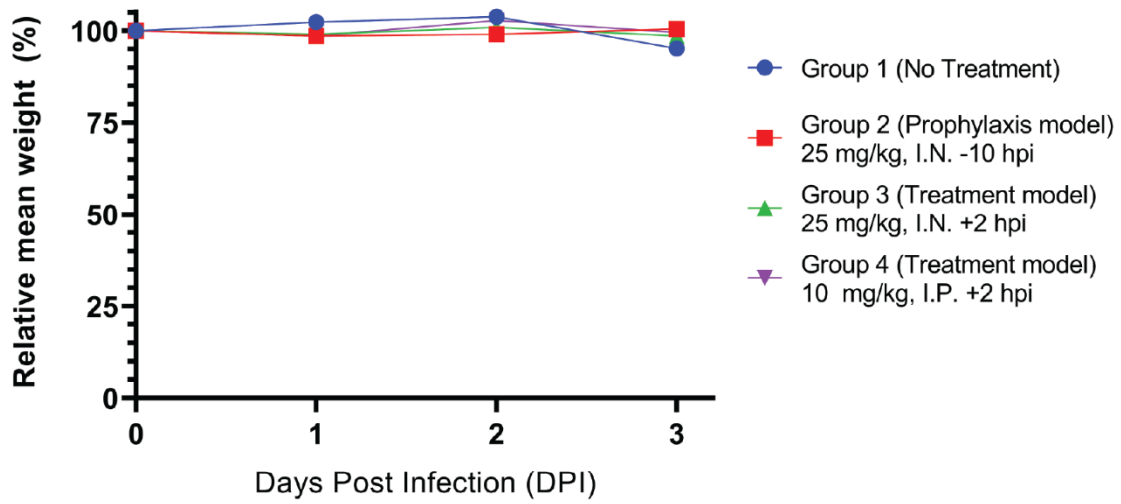

146

147

148

149

150

151

152

153

154

155

156

157

158

159

160

161

162 **Figure S4**

a

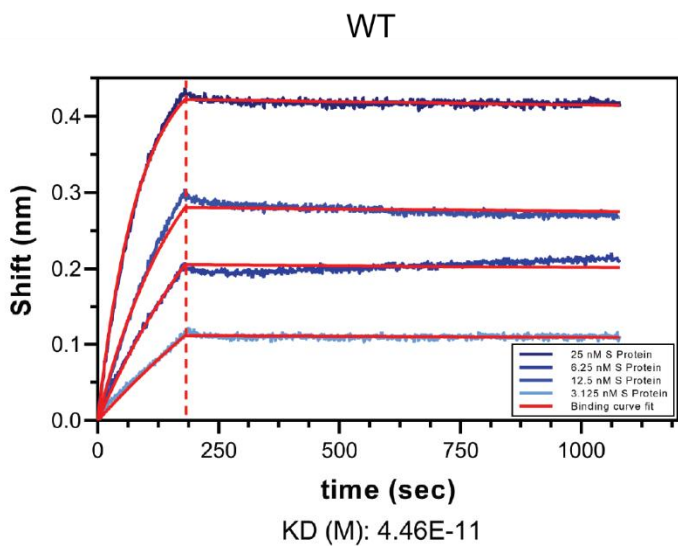

b

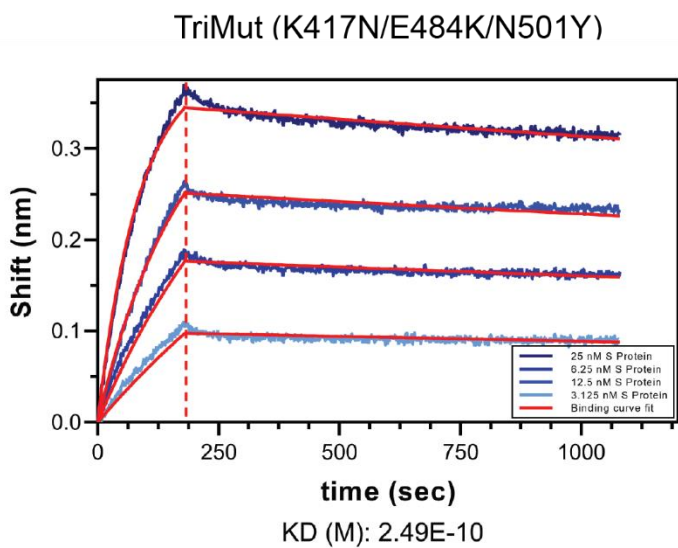

163

164

165

166

167

168

169

170 **Figure S5**

a

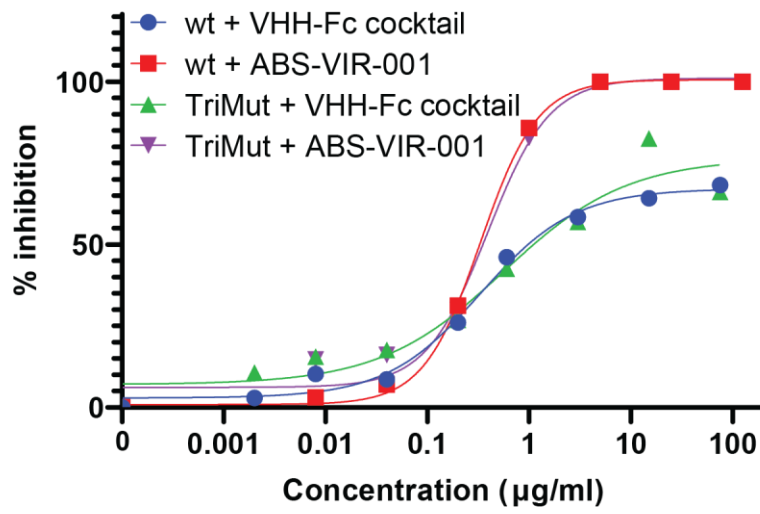

171
